# Supplementary material for: ABA block copolymers comprising a water soluble poly(N-hydroxyethyl acrylamide) B block form self-assemblies of varied morphologies in an aqueous environment
Source: Royal Society of Chemistry journal article supplement (doi:10.1039/d3py00615h), 2023-01-01
Supplement: d3py00615h1.pdf [file d3py00615h1.pdf]

## Supporting Information

### ABA block-copolymers comprising water soluble poly(*N*-hydroxyethyl acrylamide) B-block form self-assemblies of varied morphologies in aqueous environment

*Alshaimaa Almeahady, Robert Cavanagh, Giuseppe Mantovani\* and Snow Stolnik\**

School of Pharmacy, University of Nottingham, Nottingham, NG7 2RD, UK.

\* Corresponding authors:

[giuseppe.mantovani@nottingham.ac.uk](mailto:giuseppe.mantovani@nottingham.ac.uk)

[snow.stolnik@nottingham.ac.uk](mailto:snow.stolnik@nottingham.ac.uk)

Figure S1. Dynamic scanning calorimetry (DSC) thermograms of synthesized copolymers, as indicated below the thermogram.

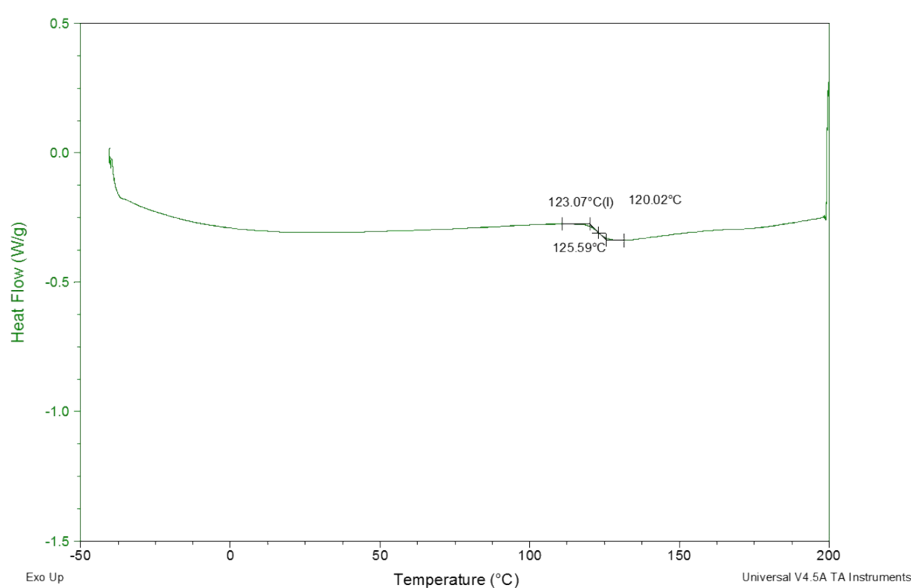

DSC thermogram of (*N*-HEA)<sub>40</sub>.  $T_g$  of 123.07 °C.

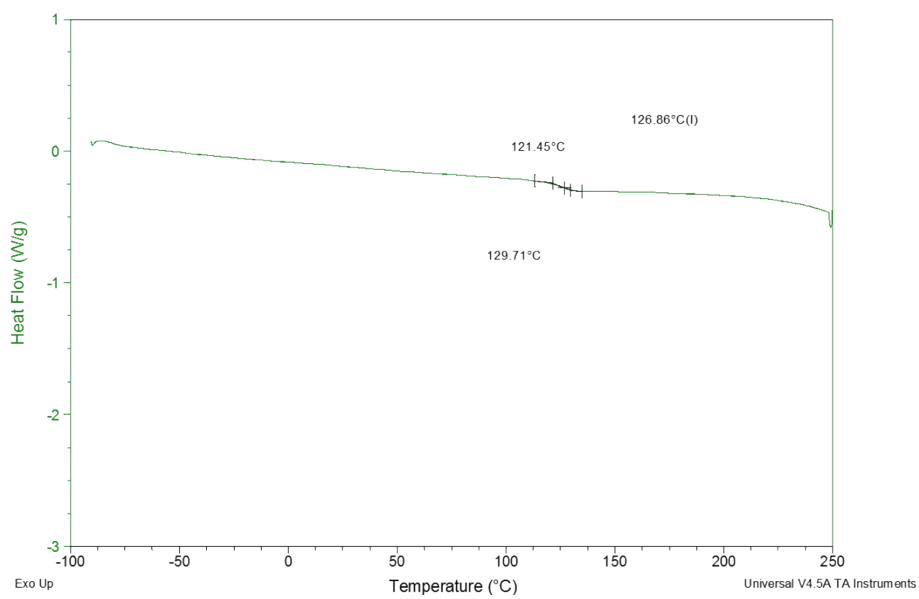

DSC thermogram of  $(n\text{-BA})_3\text{-}b\text{-}(N\text{-HEA})_{40}\text{-}b\text{-}(n\text{-BA})_3$ .  $T_g$  of 126.86 °C.

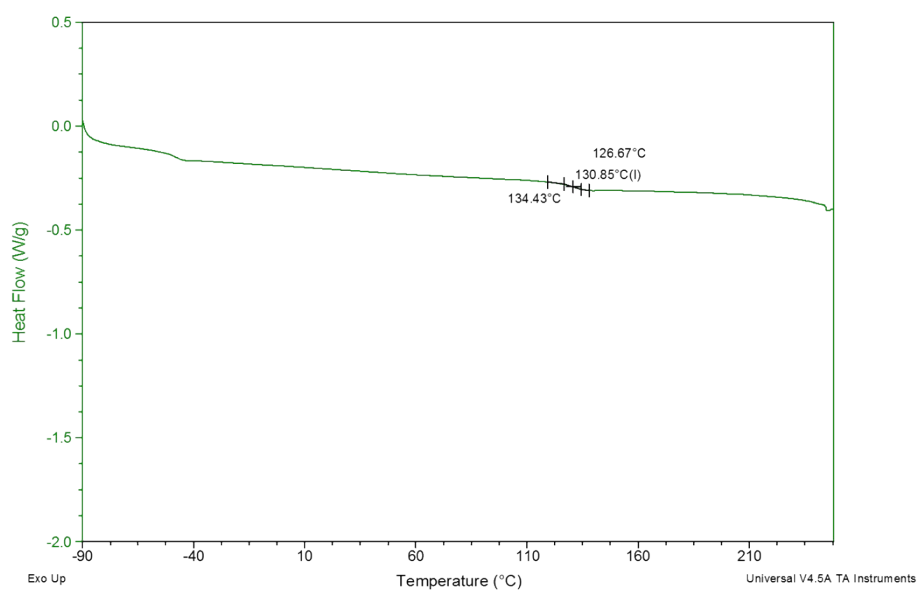

DSC thermogram of  $(n\text{-BA})_9\text{-}b\text{-}(N\text{-HEA})_{40}\text{-}b\text{-}(n\text{-BA})_9$ .  $T_g$  of 130.85 °C.

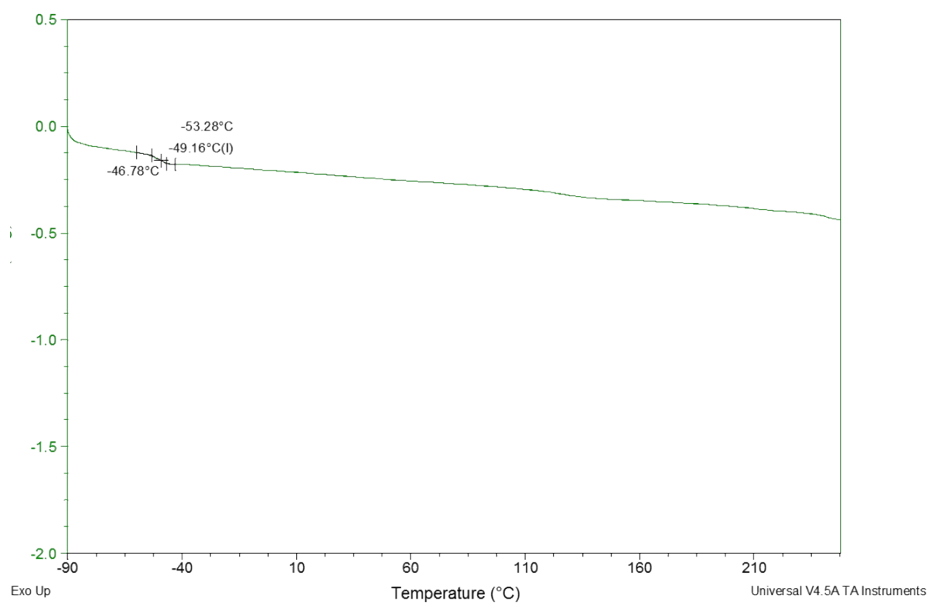

DSC thermogram of  $(n\text{-BA})_{57}\text{-}b\text{-}(N\text{-HEA})_{40}\text{-}b\text{-}(n\text{-BA})_{57}$ .  $T_g$  of  $-49.16\text{ }^\circ\text{C}$ .

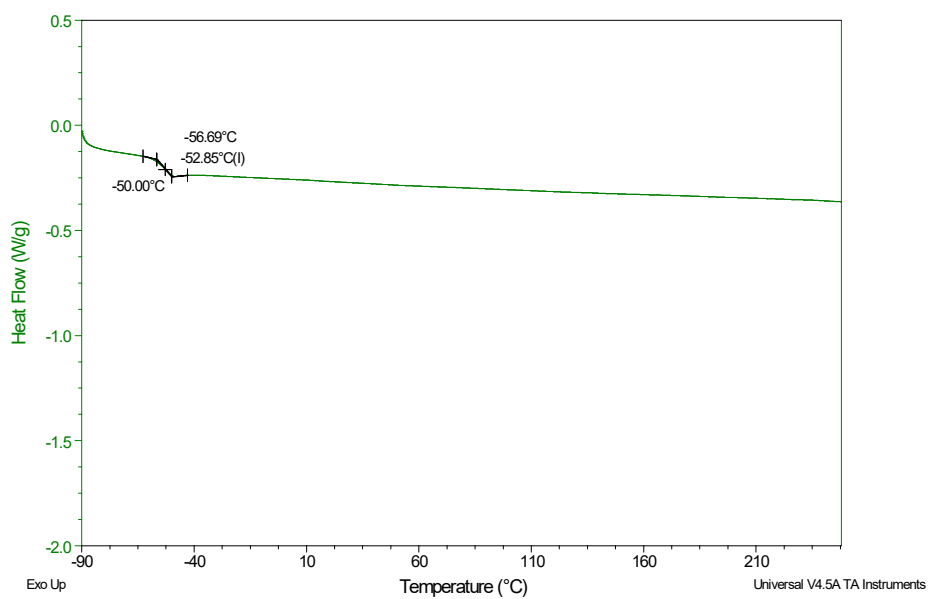

DSC thermogram demonstrated an endothermic peak of  $(n\text{-BA})_{12}$ .  $T_g$  of  $-52.85\text{ }^\circ\text{C}$ .

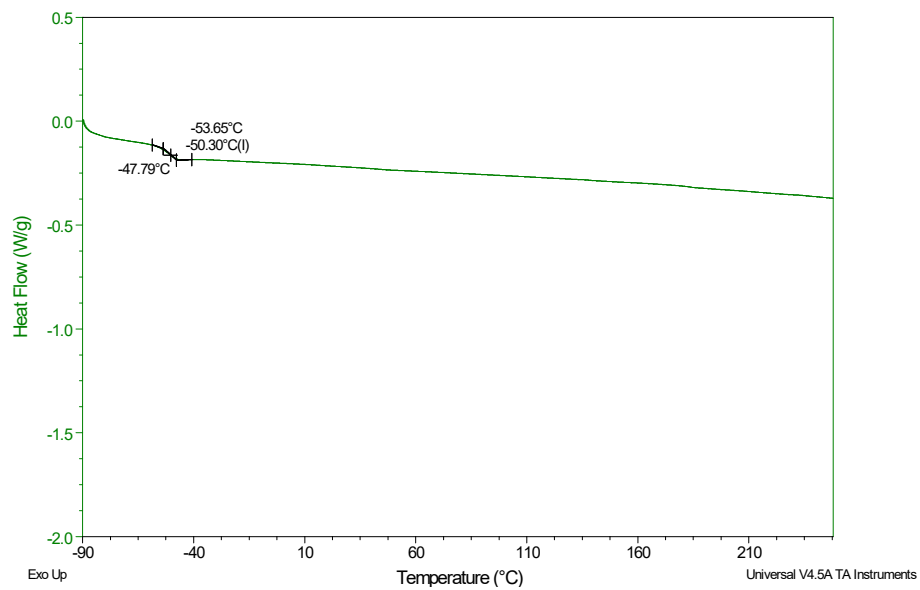

DSC thermogram of  $(n\text{-BA})_{60}$ .  $T_g$  of  $-50.30\text{ }^\circ\text{C}$ .
